# Supplementary material
Source: publisher site journal article supplement (https://www.dovepress.com/article/261783)
Supplement: Supplementary file 1 [file get_supplementary_file.php]

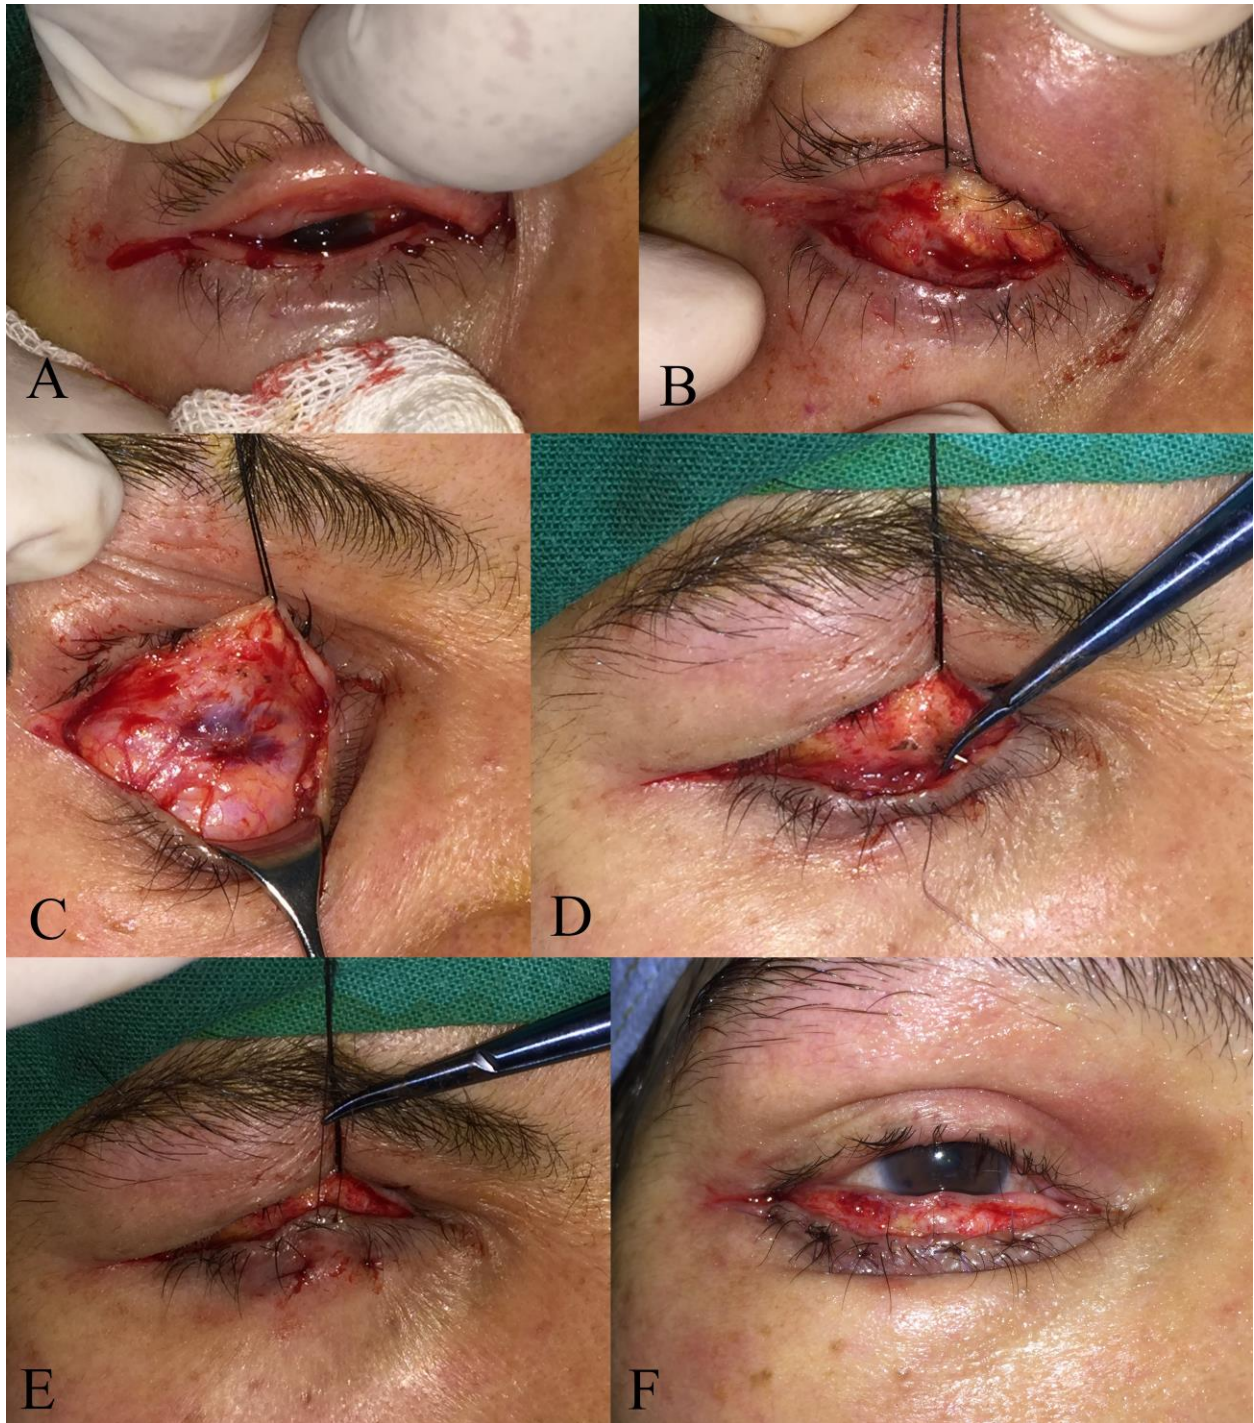

Supplementary figure 1. Surgical steps of anterior lamellar recession: (A) Grey line incision. (B) Split eyelid into anterior and posterior lamellae. (C) Expose lower eyelid retractors. (D) Suture anterior lamella in recessed position. (E) Repositioning sutures in place. (F) At the end of the surgery.

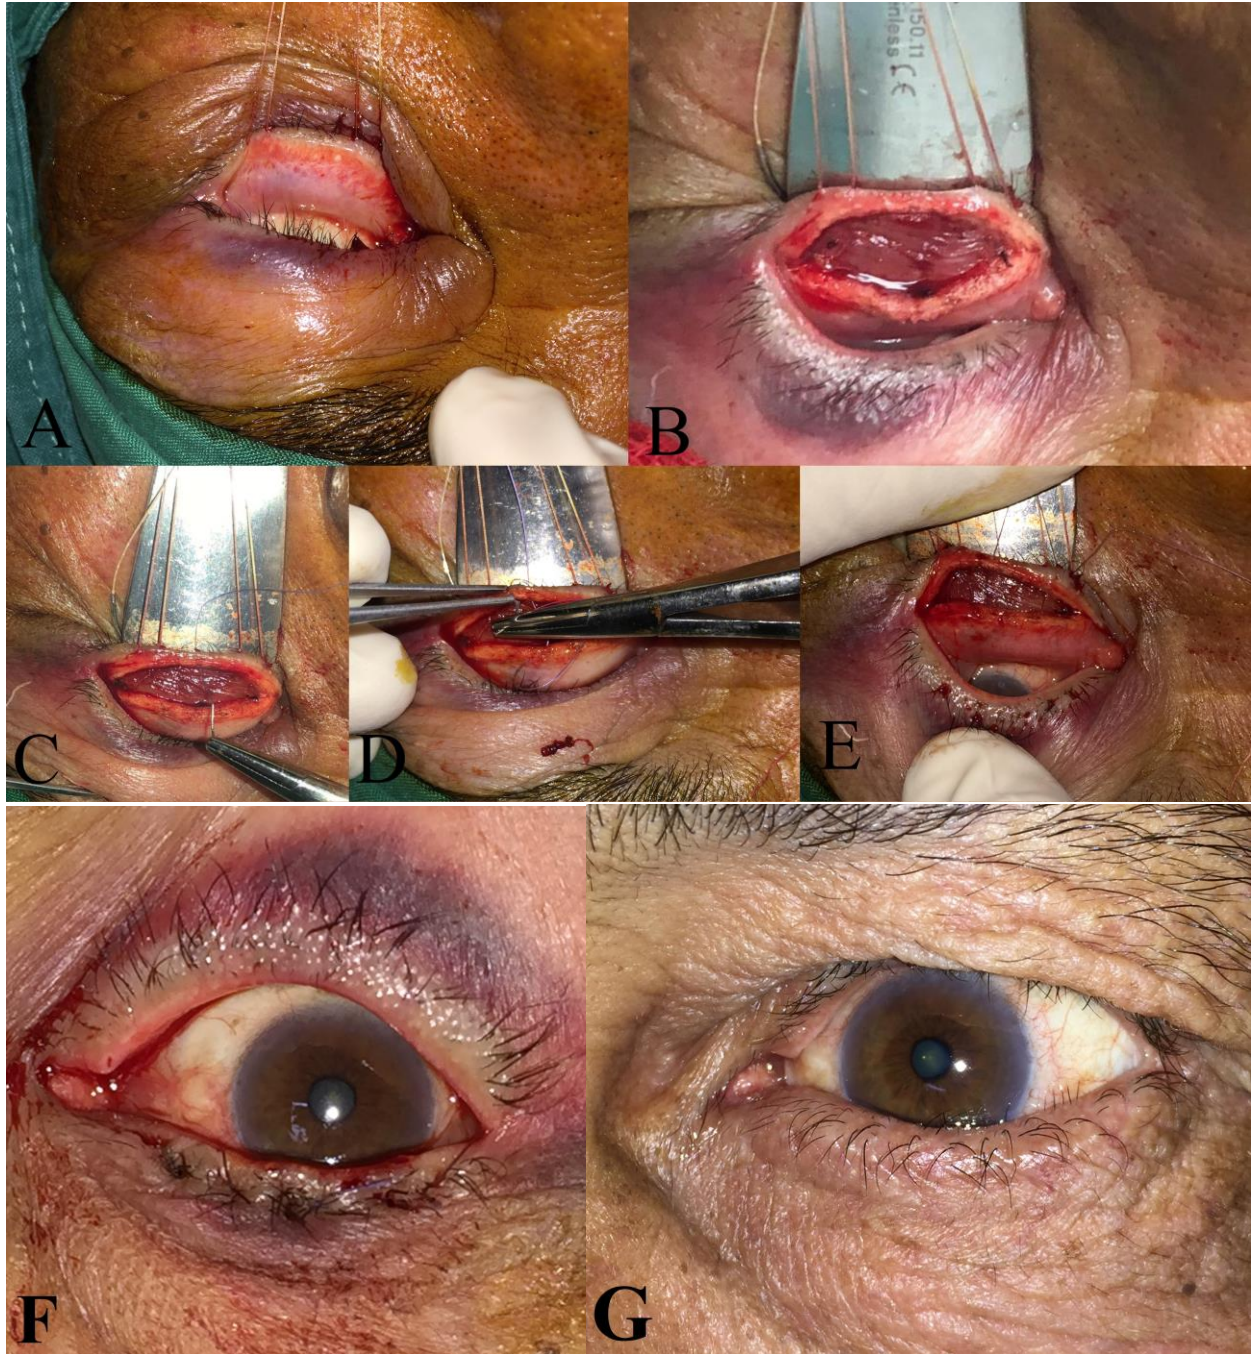

Supplementary figure 2. Surgical steps of posterior lamellar tarsal rotation: (A, B) Tarsal rotation flap is made at a point 2 mm proximal to the lid margin. (C-E) Horizontal mattress suture with double-armed 6-0 Vicryl suture is passed through the proximal tarsus and then out to skin just above the lash line of the distal lid fragment. (F) 3 everting mattress sutures before tying. Immediate postoperative appearance (G) compared to preoperative appearance (F).
